# Supplementary material for: Seismic attenuation and dispersion in poroelastic media with fractures of variable aperture distributions
Source: Copernicus journal article supplement (doi:10.5194/se-10-1321-2019), 2019-08-08
Supplement: Supplementary file [file se-10-1321-2019-supplement-title-page.pdf › se-10-1321-2019-supplement-title-page.pdf]

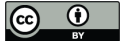

## *Supplement of*

# **Seismic attenuation and dispersion in poroelastic media with fractures of variable aperture distributions**

**Simón Lissa et al.**

*Correspondence to:* Simón Lissa ([simon.lissa@unil.ch](mailto:simon.lissa@unil.ch))

- [se-10-1321-2019-supplement-title-page.pdf](#)
- [Fracture\\_models\\_in\\_stl\\_format](#)
  - [Fracture\\_A.stl](#)
  - [Fracture\\_A\\_binarized.stl](#)
  - [Fracture\\_B.stl](#)
  - [Fracture\\_B\\_binarized.stl](#)
  - [Fracture\\_C.stl](#)
  - [Fracture\\_C\\_binarized.stl](#)
  - [Fracture\\_D.stl](#)
  - [Fracture\\_D\\_binarized.stl](#)

The copyright of individual parts of the supplement might differ from the CC BY 4.0 License.
